# Supplementary material for: Impact of agronomy practices on the effects of reduced tillage systems on CH4 and N2O emissions from agricultural fields: A global meta-analysis
Source: PLoS One. 2018 May 21;13(5):e0196703. doi: 10.1371/journal.pone.0196703 (PMC5962074; doi:10.1371/journal.pone.0196703)
Supplement: S1 Appendix — (XLSX) [file pone.0196703.s001.xlsx]

## Sheet: Sheet1
Table A. Included studies, study details, and effect sizes for GHG emissions.
Studies	Sites	Year	Tillage	n a	f b	Effect size (LnR)			Land use type	Crop	Cropping system d	Straw management	PBN e	Irrigation	Tillage duration	References
						CH4	N2O	Overall GWP c
1	China	2013	NT	4	3	0.073	-0.093	-0.119	upland	wheat	SU	remove	100	rainfed	1	[25]
			NT	4	3	0.035	-0.07	-0.085	upland	pea	SU	remove	100	rainfed	1	[25]
			NT	4	3	0.084	-0.123	-0.16	upland	wheat	SU	return	100	rainfed	1	[25]
			NT	4	3	0.03	0.029	0.029	upland	pea	SU	return	100	rainfed	1	[25]
2	China	2013	NT	3	5	0.645	0.106	0.599	paddy	rice	DR	return	50	intermittent irrigation	1	[26]
			NT	3	5	0.474	0.022	0.447	paddy	rice	DR	return	40	intermittent irrigation	1	[26]
			RT	3	5	0.072	0.04	0.069	paddy	rice	DR	return	50	intermittent irrigation	1	[26]
			RT	3	5	0.44	0.132	0.42	paddy	rice	DR	return	40	intermittent irrigation	1	[26]
3	China	2014	NT	3	4	-0.081	0.039	-0.077	paddy	rice	RUCR	return	50	-	2	[27]
			NT	3	4	-0.069	-0.186	-0.074	paddy	rice	RUCR	remove	50	-	2	[27]
4	China	2008	RT	3	3	0.178	-0.152	0.146	paddy	rice	RUCR	remove	30	intermittent irrigation	2	[28]
			RT	3	3	0.192	-0.075	0.165	paddy	rice	RUCR	remove	30	intermittent irrigation	2	[28]
			RT	3	3	0.299	-0.045	0.266	paddy	rice	RUCR	remove	30	intermittent irrigation	2	[28]
			RT	3	3	-0.126	-0.058	-0.118	paddy	rice	RUCR	remove	30	intermittent irrigation	2	[28]
			RT	3	3	-0.073	-0.037	-0.069	paddy	rice	RUCR	remove	30	intermittent irrigation	2	[28]
			RT	3	3	-0.126	-0.043	-0.117	paddy	rice	RUCR	remove	30	intermittent irrigation	2	[28]
			RT	3	3	-0.693	-0.214	-0.211	upland	wheat	-	remove	50	rainfed	2	[28]
			RT	3	3	-0.154	-0.195	-0.196	upland	wheat	-	remove	50	rainfed	2	[28]
5	China	2011	RT	3	4	0.314	-0.624	0.179	paddy	rice	RUCR	remove	50	intermittent irrigation	6	[7]
			RT	3	4	0.564	-0.547	0.302	paddy	rice	RUCR	remove	50	intermittent irrigation	6	[7]
		2012	RT	3	4	0.498	0.656	0.514	paddy	rice	RUCR	return	50	intermittent irrigation	7	[7]
			RT	3	4	0.503	0.336	0.476	paddy	rice	RUCR	return	50	intermittent irrigation	7	[7]
6	Spain	2011	NT	3	5	0.135	-0.592	-0.718	upland	wheat	SU	return	29	rainfed	17	[9]
			RT	3	5	0.776	-0.139	-0.32	upland	wheat	SU	return	29	rainfed	17	[9]
7	China	2013	NT	3	4	-0.188	-0.122	-0.121	upland	wheat	UCR	return	60	irrigation	1	[29]
			NT	3	4	0	0	0	upland	wheat	UCR	return	60	irrigation	1	[29]
			NT	3	4	0	0	0	upland	wheat	UCR	return	60	irrigation	1	[29]
			RT	3	4	0.288	0.098	0.097	upland	maize	UCR	return	50	irrigation	1	[29]
			RT	3	4	-1.386	0.312	0.314	upland	maize	UCR	return	50	irrigation	1	[29]
			RT	3	4	-1.386	0.518	0.519	upland	maize	UCR	return	50	irrigation	1	[29]
8	China	2008	NT	3	5	-0.787	0.223	-0.767	paddy	rice	DR	remove	-	intermittent irrigation	1	[30]
			NT	3	5	-0.789	0.248	-0.472	paddy	rice	DR	remove	-	intermittent irrigation	1	[30]
			NT	3	5	-1.176	0.716	-1.13	paddy	rice	DR	remove	-	intermittent irrigation	2	[30]
			NT	3	5	-0.237	0.437	-0.168	paddy	rice	DR	remove	-	intermittent irrigation	2	[30]
			NT	3	5	0.459	0.056	0.451	paddy	rice	DR	return	-	intermittent irrigation	1	[30]
			NT	3	5	-0.467	0.228	-0.314	paddy	rice	DR	return	-	intermittent irrigation	1	[30]
			NT	3	5	0.943	-0.341	0.904	paddy	rice	DR	return	-	intermittent irrigation	2	[30]
			NT	3	5	-0.403	0.27	-0.36	paddy	rice	DR	return	-	intermittent irrigation	2	[30]
9	China	2011	NT	3	4	1.131	-0.539	-0.578	upland	wheat	-	return	60	rainfed	1	[31]
10	Japan	2002	NT	2	4	0.067	-1.145	-1.148	upland	-	UCR	remove	-	rainfed	4	[32]
			NT	2	4	0.045	-0.184	-0.188	upland	-	UCR	remove	-	rainfed	4	[32]
			NT	2	4	-0.495	-1.104	-1.117	upland	-	UCR	return	100	rainfed	3	[32]
			NT	2	4	-0.192	-0.512	-0.516	upland	-	UCR	return	100	rainfed	4	[32]
			NT	2	4	-0.289	-0.479	-0.481	upland	-	UCR	return	100	rainfed	2	[32]
			NT	2	4	-0.374	-0.234	-0.23	upland	barley	UCR	return	100	rainfed	4	[32]
			NT	2	4	-0.428	-0.209	-0.204	upland	soybean	UCR	return	100	rainfed	4	[32]
			NT	2	4	-0.387	0.624	0.675	upland	-	UCR	return	100	rainfed	4	[32]
11	Philippines	2011	NT	4	3	0.069	0.904	0.078	paddy	rice	DR	return	0	rainfed	1	[33]
			NT	4	3	-0.483	0.115	-0.429	paddy	rice	DR	return	0	rainfed	1	[33]
12	America	2009	NT	3	4	-0.095	-0.215	-0.222	upland	barley	SU	return	50	irrigation	2	[11]
		2010	NT	3	4	0.346	-0.182	-0.202	upland	barley	SU	return	50	rainfed	3	[11]
		2009	NT	3	4	-0.321	-0.123	-0.11	upland	barley	SU	return	50	rainfed	2	[11]
		2008	NT	3	4	-0.318	-0.098	-0.09	upland	barley	SU	return	50	irrigation	1	[11]
		2008	NT	3	4	0	-0.054	-0.056	upland	barley	SU	return	50	rainfed	1	[11]
		2011	NT	3	4	0.154	0	-0.004	upland	barley	SU	return	50	rainfed	4	[11]
		2011	NT	3	4	-0.134	0	0.005	upland	barley	SU	return	50	rainfed	4	[11]
		2011	NT	3	4	0.176	0.028	0.024	upland	barley	SU	return	50	irrigation	4	[11]
		2008	NT	3	4	-0.317	0.016	0.027	upland	barley	SU	return	50	rainfed	1	[11]
		2010	NT	3	4	-0.154	0.038	0.052	upland	barley	SU	return	50	irrigation	3	[11]
		2010	NT	3	4	-0.197	0.065	0.08	upland	barley	SU	return	50	irrigation	3	[11]
		2008	NT	3	4	-0.143	0.08	0.089	upland	barley	SU	return	50	irrigation	1	[11]
		2009	NT	3	4	0.219	0.134	0.128	upland	barley	SU	return	50	irrigation	2	[11]
		2009	NT	3	4	-0.036	0.214	0.236	upland	barley	SU	return	50	rainfed	2	[11]
		2010	NT	3	4	-0.083	0.388	0.435	upland	barley	SU	return	50	rainfed	3	[11]
		2011	NT	3	4	0.121	0.547	0.564	upland	barley	SU	return	50	irrigation	4	[11]
13	Brazil	2004	NT	3	4	-0.717	0	-0.715	paddy	rice	RUCR	return	12	continuously flooded	8	[34]
			NT	3	4	-0.341	0.916	-0.326	paddy	rice	RUCR	return	12	continuously flooded	8	[34]
			NT	3	4	0.054	-1.735	-0.105	paddy	rice	RUCR	return	12	continuously flooded	8	[34]
14	China	2010	NT	3	3	-0.247	-0.033	-0.011	upland	maize	UCR	return	70	irrigation	7	[35]
			RT	3	3	-0.065	0.009	0.017	upland	maize	UCR	return	70	irrigation	7	[35]
			RT	3	3	-0.141	0.032	0.049	upland	maize	UCR	return	70	irrigation	7	[35]
			RT	3	3	-0.106	0.079	0.098	upland	maize	UCR	return	70	irrigation	7	[35]
15	China	2009	NT	4	2	0.505	-0.238	-0.298	upland	wheat	SU	remove	100	rainfed	10	[36]
			NT	4	2	0.316	-0.187	-0.227	upland	wheat	SU	remove	100	rainfed	10	[36]
			NT	4	2	0.192	-0.08	-0.104	upland	wheat	SU	return	100	rainfed	10	[36]
			NT	4	2	-0.046	0.13	0.151	upland	wheat	SU	return	100	rainfed	10	[36]
16	China	2007	NT	3	3	-0.173	-0.154	-0.172	paddy	rice	DR	return	-	-	3	[37]
			RT	3	3	0.405	-0.024	0.387	paddy	rice	DR	return	-	-	3	[37]
17	China	2005	NT	3	5	0.421594	0.557062	0.561068	upland	wheat	-	remove	33	rainfed	1	[38]
			NT	3	5	0.120628	0.3402	0.344499	upland	wheat	-	return	33	rainfed	1	[38]
18	China	2007	NT	3	2	-0.306258	-0.0216459	-0.014202	upland	wheat	UCR	return	33	irrigation	10	[39]
			NT	3	2	-0.396731	0.104403	0.118314	upland	wheat	UCR	return	33	irrigation	10	[39]
			RT	3	2	0.0242436	-0.118051	-0.122674	upland	wheat	UCR	return	50	irrigation	10	[39]
			RT	3	2	0.104747	-0.0460103	-0.0509306	upland	wheat	UCR	return	50	irrigation	10	[39]
			RT	3	2	0.0653051	-0.0216459	-0.0243899	upland	wheat	UCR	return	50	irrigation	10	[39]
			RT	3	2	-0.0479134	0.0283038	0.0309084	upland	wheat	UCR	return	50	irrigation	10	[39]
			RT	3	2	-0.124384	0.0444518	0.0499577	upland	wheat	UCR	return	50	irrigation	10	[39]
			RT	3	2	0.0786923	0.0625928	0.0620159	upland	wheat	UCR	return	50	irrigation	10	[39]
19	China	2010	RT	3	4	-0.314066	0.539699	-0.305071	paddy	rice	RUCR	remove	50	intermittent irrigation	1	[40]
			RT	3	4	-0.146823	-0.141238	-0.146786	paddy	rice	RUCR	remove	50	intermittent irrigation	1	[40]
20	China	2008	NT	3	2	-0.626898	-0.382369	-0.375999	upland	wheat	UCR	remove	60	irrigation	1	[41]
			NT	3	2	-0.479573	0.0983109	0.111389	upland	wheat	UCR	return	60	irrigation	1	[41]
			RT	3	2	-0.131576	0.054559	0.0595501	upland	wheat	UCR	remove	60	irrigation	1	[41]
			RT	3	2	-0.074108	0.0163938	0.0189857	upland	wheat	UCR	return	60	irrigation	1	[41]
21	America	2010	NT	3	4	-0.201607	-0.267388	-0.272364	upland	barley	SU	remove	50	irrigation	3	[13]
		2009	NT	3	4	-0.189757	-0.0888312	-0.0779944	upland	barley	SU	remove	50	irrigation	2	[13]
		2009	NT	3	4	-0.0472529	-0.0171678	-0.0104348	upland	barley	SU	remove	50	irrigation	2	[13]
		2008	NT	3	4	-0.0914765	-0.017121	-0.00938795	upland	barley	SU	remove	50	irrigation	1	[13]
		2008	NT	3	4	-0.156985	-0.0060883	0.00399459	upland	barley	SU	remove	50	irrigation	1	[13]
		2010	NT	3	4	0.228593	0.13415	0.104461	upland	barley	SU	remove	50	irrigation	3	[13]
22	Mexico	2010	RT	3	5	-0.564816	-0.14638	-0.11981	upland	maize	UCR	return	-	rainfed	18	[42]
		2008	RT	3	5	0.203983	0.0534252	0.0501341	upland	maize	UCR	return	-	rainfed	18	[42]
23	China	2008	NT	3	1	-0.749237	1.36598	-1.56288	upland	oat	SU	return	100	rainfed	1	[43]
		2008	NT	3	1	-0.318454	1.05738	-0.574507	upland	oat	SU	return	100	rainfed	1	[43]
		2008	NT	3	1	-0.185965	0.39317	-0.247737	upland	oat	SU	return	100	rainfed	1	[43]
24	China	2010	NT	4	2	0.29267	-0.376316	-0.414006	upland	pea	SU	remove	100	rainfed	9	[44]
			NT	4	2	0.628609	-0.252758	-0.312137	upland	wheat	SU	remove	100	rainfed	9	[44]
			NT	4	2	0.420864	-0.352763	-0.442794	upland	pea	SU	return	100	rainfed	9	[44]
			NT	4	2	0.19448	0.834151	0.902747	upland	wheat	SU	return	100	rainfed	9	[44]
25	America	2004	NT	4	3	0.175891	-0.264999	-0.267085	upland	corn	SU	remove	100	rainfed	10	[10]
			NT	4	3	-0.485508	-0.244111	-0.243305	upland	corn	SU	remove	100	rainfed	10	[10]
			NT	4	3	-0.0377403	0.120446	0.122728	upland	Soybean	SU	remove	100	rainfed	10	[10]
			NT	4	3	-0.65678	0.195567	0.204484	upland	Soybean	SU	remove	100	rainfed	10	[10]
			NT	4	3	0.143101	0.0160646	0.0155551	upland	corn	SU	return	100	rainfed	10	[10]
			NT	4	3	0.287682	0.14842	0.146084	upland	Soybean	SU	return	100	rainfed	10	[10]
			RT	4	3	-0.262364	-0.730265	-0.732511	upland	corn	SU	remove	50	rainfed	10	[10]
			RT	4	3	-0.251314	0.155293	0.160496	upland	Soybean	SU	remove	100	rainfed	10	[10]
26	China	2008	RT	3	5	-0.146562	-0.178954	-0.152826	paddy	rice	RUCR	remove	30	intermittent irrigation	1	[45]
			RT	3	5	0.0725819	-0.331081	0.0486291	paddy	rice	RUCR	return	30	intermittent irrigation	1	[45]
27	China	2008	NT	3	3	-0.252838	0.250462	-0.242669	paddy	rice	RUCR	return	40	continuously flooded	1	[12]
			NT	3	3	-0.243978	0.279224	-0.182622	paddy	rice	RUCR	return	40	continuously flooded	1	[12]
28	Brazil	2002	NT	4	4	-0.497678	-0.13962	-0.284564	paddy	rice	RUCR	return	-	-	5	[46]
29	Japan	2005	NT	3	4	-0.661059	0.485508	-0.639268	paddy	rice	-	remove	-	continuously flooded	2	[6]
			RT	3	4	0.0320883	0.559616	0.0391903	paddy	rice	-	remove	-	-	2	[6]
30	America	2004	NT	3	5	-1.56398	0.257265	0.257973	upland	maize	SU	return	-	irrigation	5	[47]
			NT	3	5	-1.80829	0.836683	0.840197	upland	maize	SU	return	-	irrigation	5	[47]
31	Japan	2001	RT	3	4	1.0748	-0.0550598	-0.259324	upland	wheat	UCR	remove	-	rainfed	20	[48]
			RT	3	4	0.199666	0.489548	0.721001	upland	wheat	UCR	remove	-	rainfed	20	[48]
			RT	3	4	0.525483	1.93747	2.14529	upland	wheat	UCR	remove	-	rainfed	20	[48]
32	America	1994	NT	3	4	0.239951	0.0706176	-1.36008	upland	wheat	SU	remove	-	rainfed	26	[16]
		1996	NT	3	4	0.0124225	-0.156569	-0.571468	upland	wheat	SU	remove	-	rainfed	26	[16]
		1996	RT	3	4	0.0124225	-0.0145988	-0.0664402	upland	wheat	SU	remove	-	rainfed	26	[16]
		1994	RT	3	4	0.185142	-0.0246926	-3.31475	upland	wheat	SU	remove	-	rainfed	26	[16]
33	America	1996	NT	3	2	0.129678	-0.519875	-0.883796	upland	wheat	SU	remove	-	rainfed	26	[49]
			RT	3	2	-0.0155042	-0.0385723	-0.0463855	upland	wheat	SU	remove	-	rainfed	26	[49]
34	Spain	2012	NT	3	5	-0.202458	-0.26586	-0.284338	upland	vetch	UCR	return	23	rainfed	1	[50]
			NT	3	5	-0.339455	0.216803	0.405823	upland	barley	UCR	return	23	rainfed	1	[50]
			RT	3	5	0.305266	-0.0426374	-0.269435	upland	barley	UCR	return	23	rainfed	1	[50]
			RT	3	5	-0.020456	0.144303	0.185914	upland	vetch	UCR	return	23	rainfed	1	[50]
35	China	2008	NT	3	4	0.818917	-0.750306	-0.91482	upland	wheat	UCR	return	17	irrigation	16	[51]
			NT	3	4	0.402023	-0.71562	-0.801262	upland	wheat	UCR	return	17	irrigation	16	[51]
			NT	3	4	-0.312375	-0.536928	-0.540535	upland	maize	UCR	return	0	irrigation	16	[51]
			NT	3	4	-0.247836	-0.391076	-0.393281	upland	maize	UCR	return	0	irrigation	16	[51]
			RT	3	4	-0.187212	-0.480689	-0.485578	upland	maize	UCR	return	0	irrigation	16	[51]
			RT	3	4	0.0204089	-0.364643	-0.383556	upland	maize	UCR	return	17	irrigation	16	[51]
36	China	2012	RT	3	4	-2.3979	-0.351398	-0.345422	upland	wheat	-	remove	-	rainfed	1	[52]
37	China	2014	NT	3	4	-0.146369	0.0833816	-0.139325	paddy	rice	RUCR	remove	-	intermittent irrigation	2	[53]
			NT	3	4	-0.0867915	0.112267	-0.0790868	paddy	rice	RUCR	remove	-	intermittent irrigation	2	[53]
38	China	2013	NT	3	2	0.182322	-0.219859	-0.279609	upland	pea	SU	remove	100	rainfed	2	[54]
			NT	3	3	0.227217	-0.139113	-0.193449	upland	wheat	SU	remove	100	rainfed	2	[54]
			NT	3	2	0.113329	-0.144581	-0.185925	upland	wheat	SU	remove	100	rainfed	2	[54]
			NT	3	2	0.18067	-0.233615	-0.304533	upland	pea	SU	return	100	rainfed	2	[54]
			NT	3	3	0.120628	-0.185403	-0.251202	upland	wheat	SU	return	100	rainfed	2	[54]
			NT	3	2	0.102948	-0.178248	-0.233535	upland	wheat	SU	return	100	rainfed	2	[54]
39	Spain	2012	NT	4	2	-0.654509	-0.35371	-0.350865	upland	rye	SU	remove	34	rainfed	7	[55]
40	Spain	2011	NT	3	4	-0.446675	-0.356675	-0.418777	paddy	rice	-	remove	35	continuously flooded	2	[56]
			NT	3	4	-0.843087	0.197531	-0.400126	paddy	rice	-	remove	35	continuously flooded	2	[56]
			NT	3	4	-2.03103	0.735707	-0.594174	paddy	rice	-	remove	35	continuously flooded	2	[56]
41	China	2012	NT	3	5	0.14125	-0.0785133	0.138336	paddy	rice	DR	remove	50	intermittent irrigation	1	[57]
			NT	3	5	0.0620941	0.465757	0.0646538	paddy	rice	DR	remove	50	intermittent irrigation	1	[57]
			NT	3	5	0.0112291	0.280383	0.0132105	paddy	rice	DR	remove	50	intermittent irrigation	1	[57]
			NT	3	5	0.316605	0.116613	0.310946	paddy	rice	DR	remove	50	intermittent irrigation	1	[57]
			NT	3	5	0.0933393	-0.450101	0.0876245	paddy	rice	DR	return	50	intermittent irrigation	2	[57]
			NT	3	5	0.0174351	0.332038	0.0213186	paddy	rice	DR	return	50	intermittent irrigation	2	[57]
			NT	3	5	0.316605	0.165147	0.31471	paddy	rice	DR	return	50	intermittent irrigation	2	[57]
			NT	3	5	0.120265	0.700193	0.13167	paddy	rice	DR	return	50	intermittent irrigation	2	[57]
			NT	3	5	0.0519754	-0.180606	0.0497497	paddy	rice	DR	remove	50	intermittent irrigation	3	[57]
			NT	3	5	0.167309	0.367725	0.168049	paddy	rice	DR	remove	50	intermittent irrigation	3	[57]
			NT	3	5	0.0724817	0.308647	0.073352	paddy	rice	DR	remove	50	intermittent irrigation	3	[57]
			NT	3	5	0.223523	0.159903	0.222614	paddy	rice	DR	remove	50	intermittent irrigation	3	[57]
			NT	3	5	0.124978	-0.415156	0.121674	paddy	rice	DR	return	50	intermittent irrigation	4	[57]
			NT	3	5	0.203752	0.287682	0.204311	paddy	rice	DR	return	50	intermittent irrigation	4	[57]
			NT	3	5	0.223523	0.747214	0.227239	paddy	rice	DR	return	50	intermittent irrigation	4	[57]
			NT	3	5	0.131101	0.256316	0.132543	paddy	rice	DR	return	50	intermittent irrigation	4	[57]
42	China	2010	NT	3	5	0.429502	-0.829906	-0.0701805	paddy	rice	RUCR	remove	-	continuously flooded	1	[23]
			NT	3	5	0.66589	-1.13693	0.0522618	paddy	rice	RUCR	remove	-	continuously flooded	1	[23]
43	India	2012	NT	3	5	0.0677726	-0.0350913	0.0431504	paddy	rice	RUCR	remove	50	-	1	[58]
			NT	3	5	0.0716297	-0.0157484	0.0522977	paddy	rice	RUCR	remove	50	-	1	[58]
44	Japan	2011	RT	3	3	0.605906	0.405465	0.590713	paddy	rice	-	return	-	intermittent irrigation	1	[59]
			RT	3	3	0.0795121	-0.165514	0.0601085	paddy	rice	-	return	-	intermittent irrigation	1	[59]
			RT	3	3	0.0903226	0	0.090528	paddy	rice	-	return	-	intermittent irrigation	1	[59]
			RT	3	3	0	0.597837	0.00447285	paddy	rice	-	return	-	intermittent irrigation	1	[59]
45	Japan	2011	NT	3	4	-0.278302	-0.71784	-1.03784	upland	vegetable	UCR	return	-	-	1	[60]
			NT	3	4	0.233994	-0.473882	-0.562079	upland	vegetable	UCR	return	-	-	1	[60]
			NT	3	4	-1.53846	-0.373426	-0.244607	upland	vegetable	UCR	return	-	-	1	[60]
			NT	3	4	-0.0385443	0.597133	0.987552	upland	vegetable	UCR	return	-	-	1	[60]
			NT	3	4	0.162909	0.451985	0.251715	upland	vegetable	UCR	return	-	-	1	[60]
46	Spain	2010	NT	3	3	-0.520387	-0.0496285	0.103879	Upland	vetch	UCR	return	-	rainfed	16	[61]
			RT	3	3	0.716024	0.83848	0.888156	Upland	vetch	UCR	return	-	rainfed	16	[61]
47	China	2009	NT	4	3	-0.472156	0.216223	0.195588	upland	bioenergy crop	SU	-	-	rainfed	1	[62]
			NT	4	3	-0.391179	-0.0891278	-0.10341	upland	bioenergy crop	SU	-	-	rainfed	1	[62]
48	China	2011	NT	3	3	0.249796	-0.111348	-0.247544	upland	wheat	SU	remove	-	rainfed	1	[63]
			NT	3	3	0.0864255	-0.168751	-0.203841	upland	pea	SU	remove	-	rainfed	1	[63]
			NT	3	3	0.133718	-0.0156178	-0.0985862	upland	wheat	SU	return	-	rainfed	1	[63]
			NT	3	3	0.104225	0.024273	0.00885911	upland	pea	SU	return	-	rainfed	1	[63]
49	China	2011	NT	3	4	0.391496	-0.0707752	0.137721	paddy	rice	RUCR	return	-	-	1	[64]
a number of replicates
b number number of CH4 and N2O fluxes measurements per month
c overall GWP of CH4 and N2O
d SU: single upland crops; UCR: upland crops rotation; RUCR: rice-upland crops rotation; DR: double rice
e percentage of basal N fertilizer
