# Supplementary material for: Impact of agronomy practices on the effects of reduced tillage systems on CH4 and N2O emissions from agricultural fields: A global meta-analysis
Source: PLoS One. 2018 May 21;13(5):e0196703. doi: 10.1371/journal.pone.0196703 (PMC5962074; doi:10.1371/journal.pone.0196703)
Supplement: S2 Appendix — (DOCX) [file pone.0196703.s002.docx]

**Literature search strategy:**

The keywords used in literature search were “soil tillage”, “no-tillage”, “reduced tillage”, “CH4”, “N2O”, and “greenhouse gas emission”.

The literature search was conducted in the ISI-Web of Science and Google Scholar.

The literature search strategy were:

1. “soil tillage” and “CH4” within all years
2. “soil tillage” and “N2O” within all years
3. “soil tillage” and “greenhouse gas emission” within all years
4. “no-tillage” and “CH4” within all years
5. “no-tillage” and “N2O” within all years
6. “no-tillage” and “greenhouse gas emission” within all years
7. “reduced tillage” and “CH4” within all years
8. “reduced tillage” and “N2O” within all years
9. “reduced tillage” and “greenhouse gas emission” within all years
